# Supplementary material
Source: PubMed Central journal article supplement (PMC6532039)
Supplement: AEM.03126-18-s0001.pdf [file AEM.03126-18-s0001.pdf]

1 **Multilocus sequence analysis, a rapid and accurate tool for taxonomic**  
2 **classification, evolutionary relationship and population biology of the genus**  
3 ***Shewanella*.**

4 Yujie Fang<sup>a,b,c</sup>, Yonglu Wang<sup>d</sup>, Zongdong Liu<sup>e</sup>, Hang Dai<sup>a,b,c</sup>, Hongyan Cai<sup>a,b,c</sup>,  
5 Zhenpeng Li<sup>a,b</sup>, Zongjun Du<sup>f</sup>, Xin Wang<sup>a,b</sup>, Huaiqi Jing<sup>a,b</sup>, Qiang Wei<sup>c,g</sup>, Biao Kan<sup>a,b</sup>,  
6 Duochun Wang<sup>a,b,c\*</sup>

7 <sup>a</sup> State Key Laboratory of Infectious Disease Prevention and Control, National  
8 Institute for Communicable Disease Control and Prevention, Chinese Center for  
9 Disease Control and Prevention (China CDC), Beijing, 102206, China.

10 <sup>b</sup> Collaborative Innovation Center for Diagnosis and Treatment of Infectious Diseases,  
11 Hangzhou, 310003, China.

12 <sup>c</sup> Center for Human Pathogenic Culture Collection, China CDC, Beijing, 102206,  
13 China.

14 <sup>d</sup> Ma'anshan Center for Disease Control and Prevention, Anhui Province, China.

15 <sup>e</sup> Laizhou Center for Disease Control and Prevention, Shandong Province, China.

16 <sup>f</sup> College of Marine Science, Shandong University at Weihai, China.

17 <sup>g</sup> Office of laboratory management, China CDC, Beijing, 102206, China.

18 Running title: Multilocus sequence analysis of genus *Shewanella*.

19 \*Correspondence Author: Duochun Wang, wangduochun@icdc.cn, Changbai Road  
20 155, Changping, Beijing, 102206, China.

21

22 **Supplementary figures**

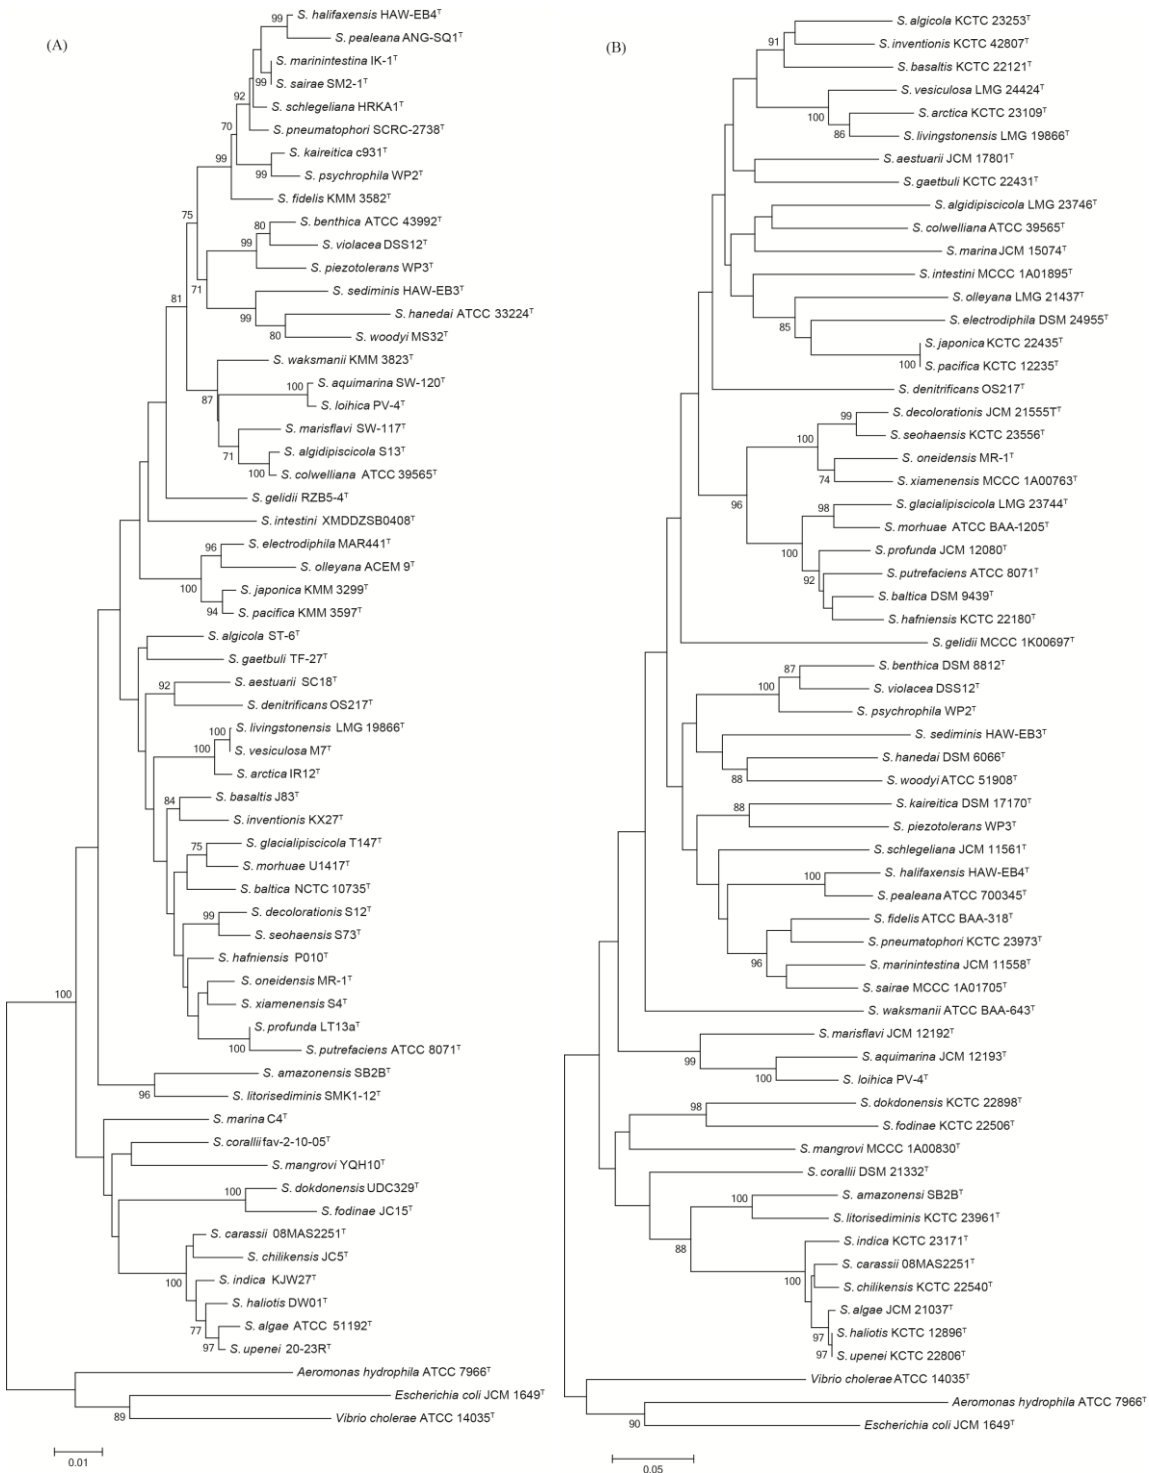

23

24

25

26

27

28

29

(C)

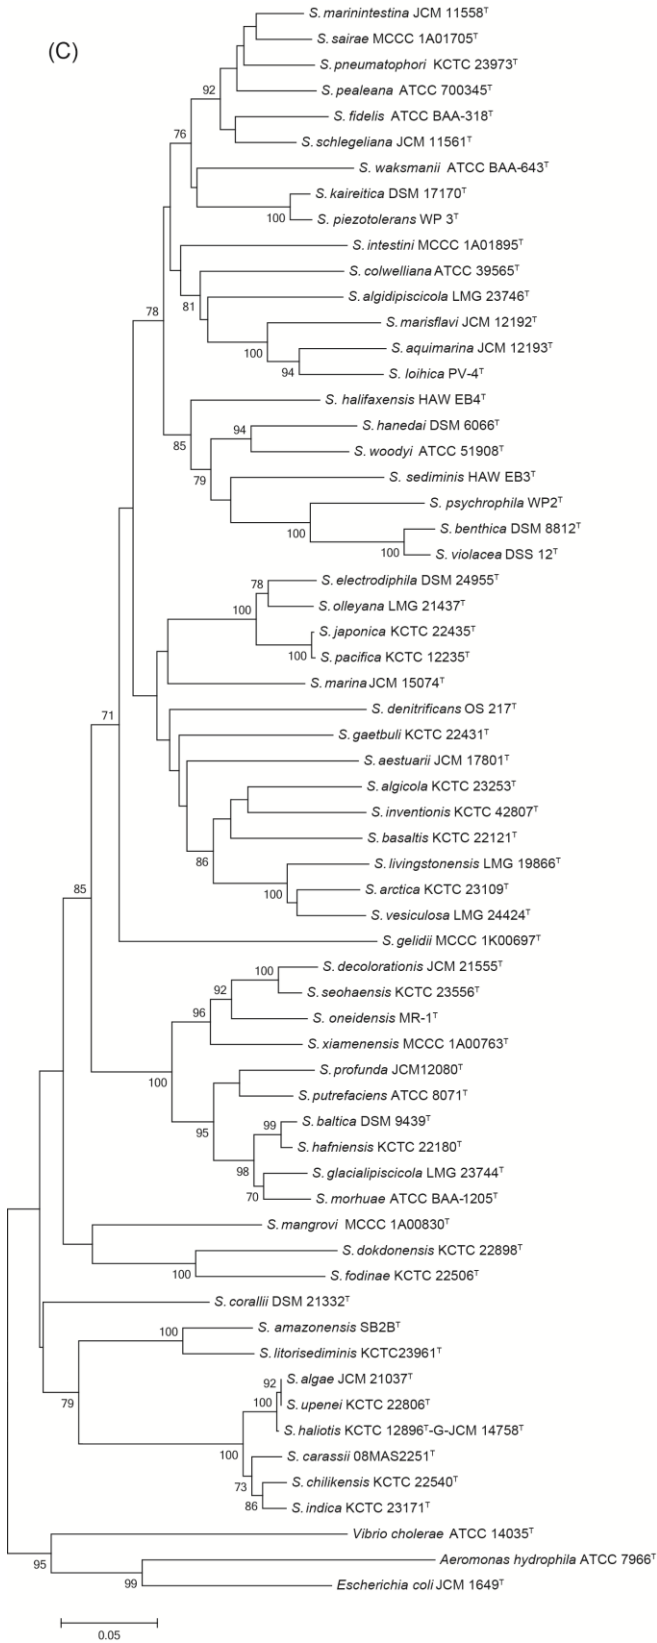

(D)

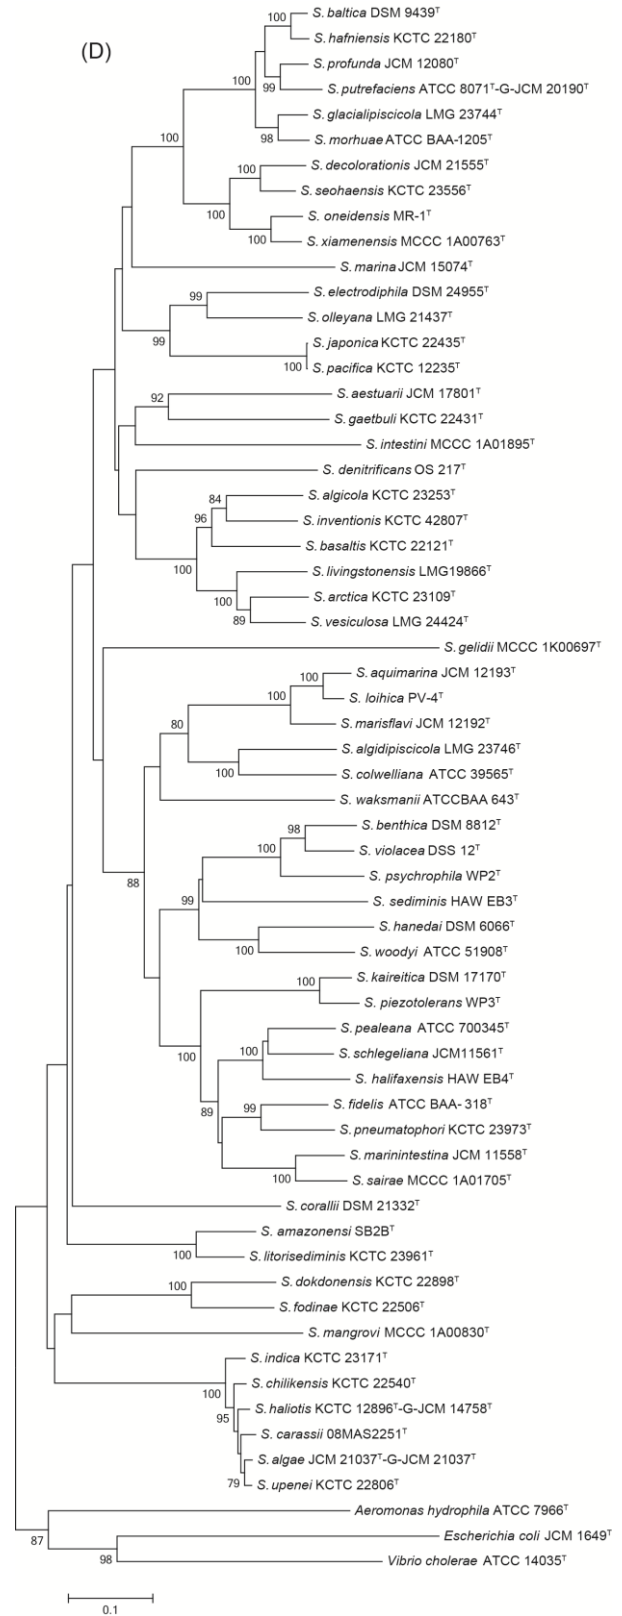

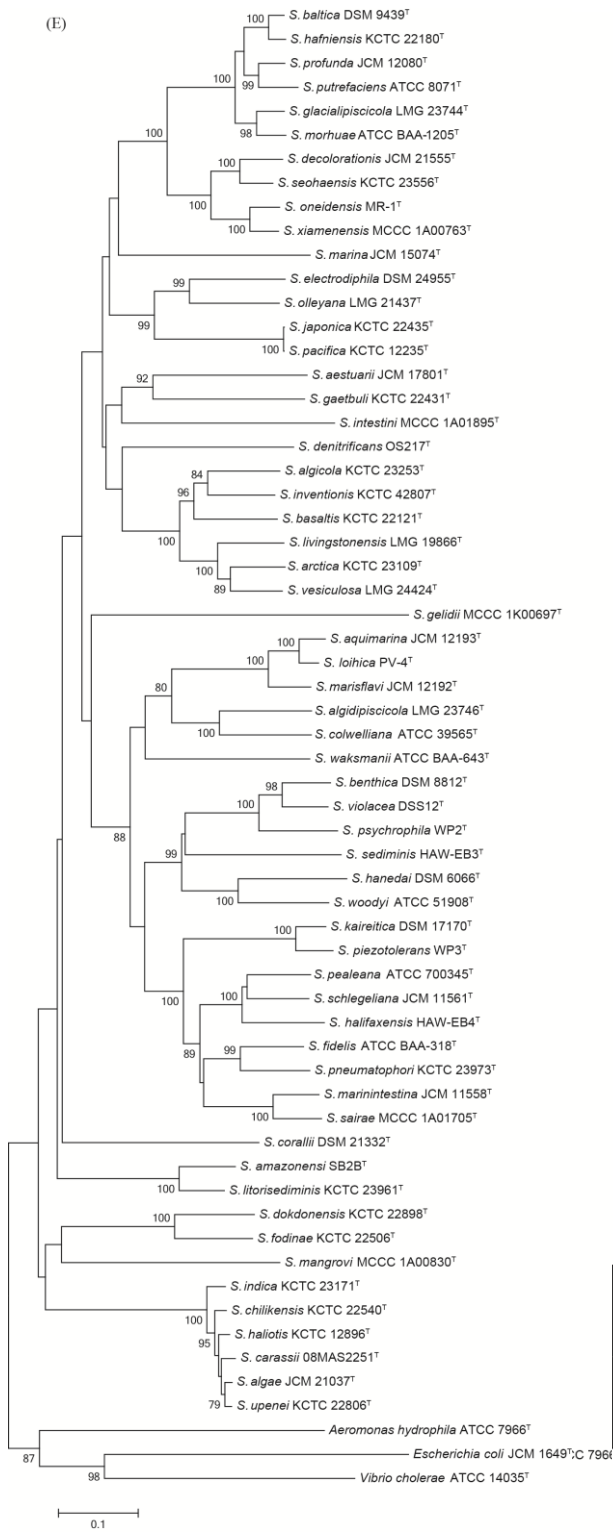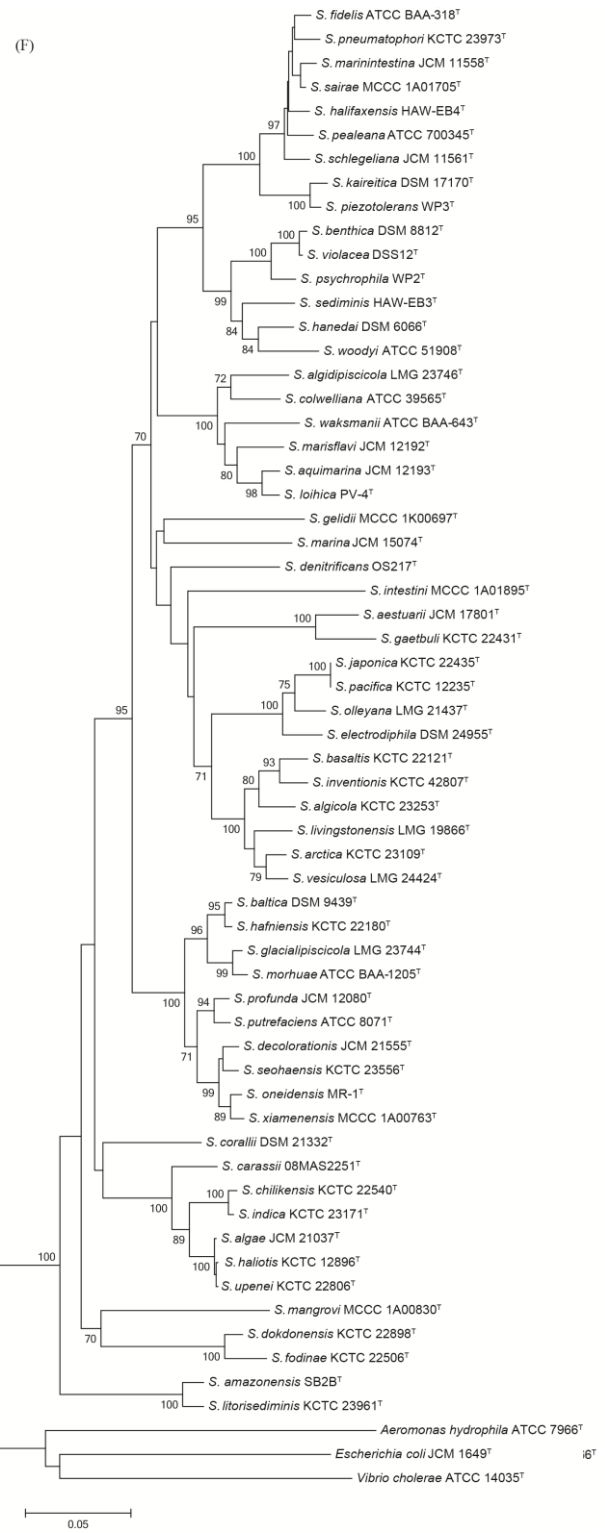

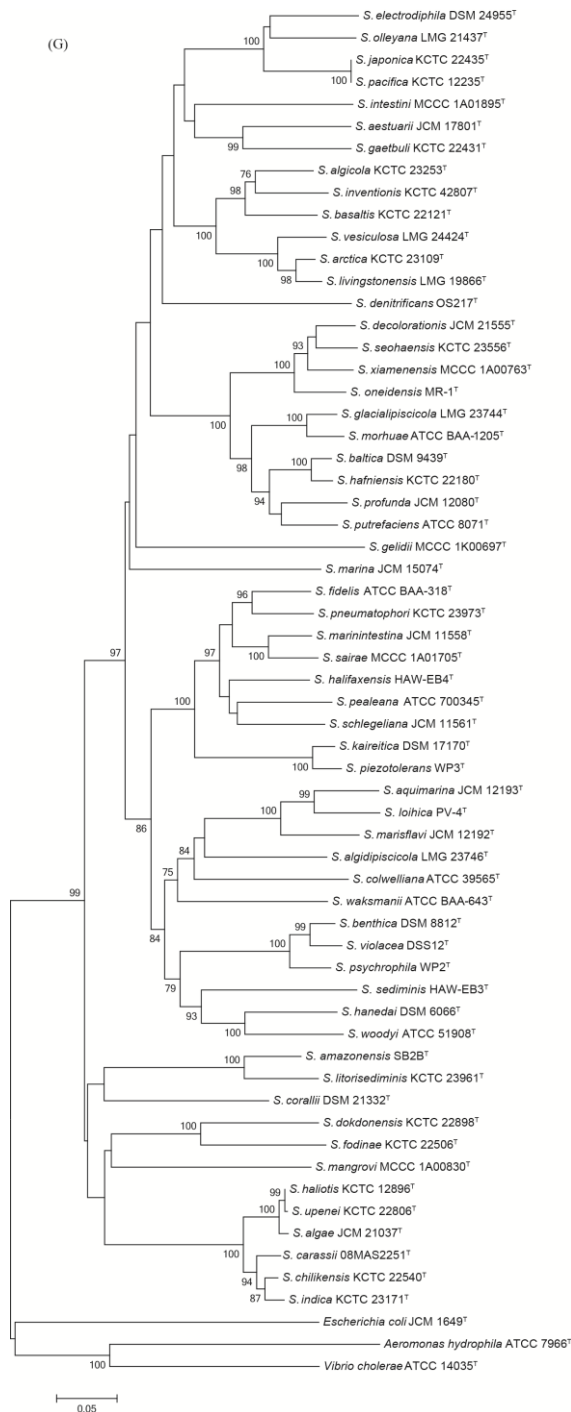

31

32 **Figure S1.** Phylogenetic trees reconstructed by the neighbour-joining method based  
 33 on individual genes of 16S rRNA (A), *gyrA* (B), *gyrB* (C), *infB* (D), *recN* (E), *rpoA* (F)  
 34 and *topA* (G). Fifty-nine *Shewanella* type strains were involved in the analysis.  
 35 Numbers at nodes indicated bootstrap values (percentage of 1000 replicates)  
 36 and >70% were shown at branch points. Bar and values estimated nucleotide  
 37 substitutions per site. The type strains of *Aeromonas hydrophila* ATCC 7966<sup>T</sup>,  
 38 *Escherichia coli* JCM 1649<sup>T</sup> and *Vibrio cholerae* ATCC 14035<sup>T</sup> served as outgroups.

39

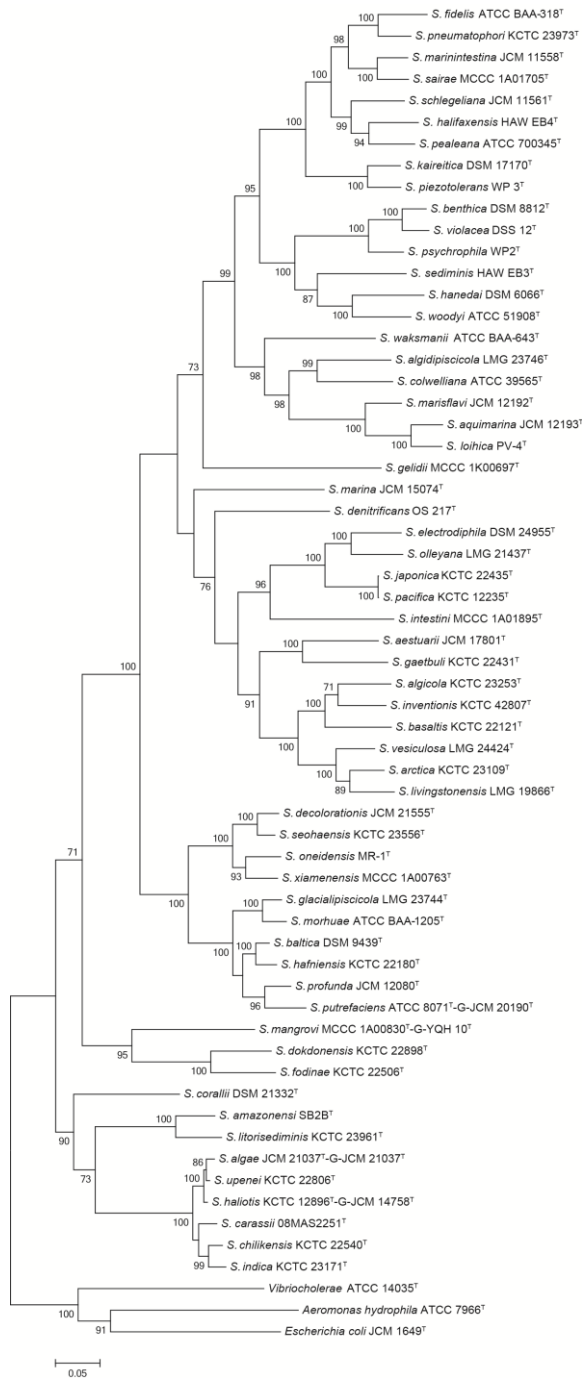

40

41 **Figure S2.** Phylogenetic tree reconstructed by the maximum-likelihood method based  
 42 on concatenated six gene sequences (*gyrA*, *gyrB*, *infB*, *recN*, *rpoA* and *topA*, 4191 bp)  
 43 of fifty-nine *Shewanella* type strains. The robustness of tree topologies was evaluated  
 44 with 1000 bootstrap replications and values greater than 70% were shown at nodes of  
 45 branches. The scale bar indicates substitutions per site. The type strains of *Aeromonas*  
 46 *hydrophila* ATCC 7966<sup>T</sup>, *Escherichia coli* JCM 1649<sup>T</sup> and *Vibrio cholerae* ATCC  
 47 14035<sup>T</sup> served as outgroups.

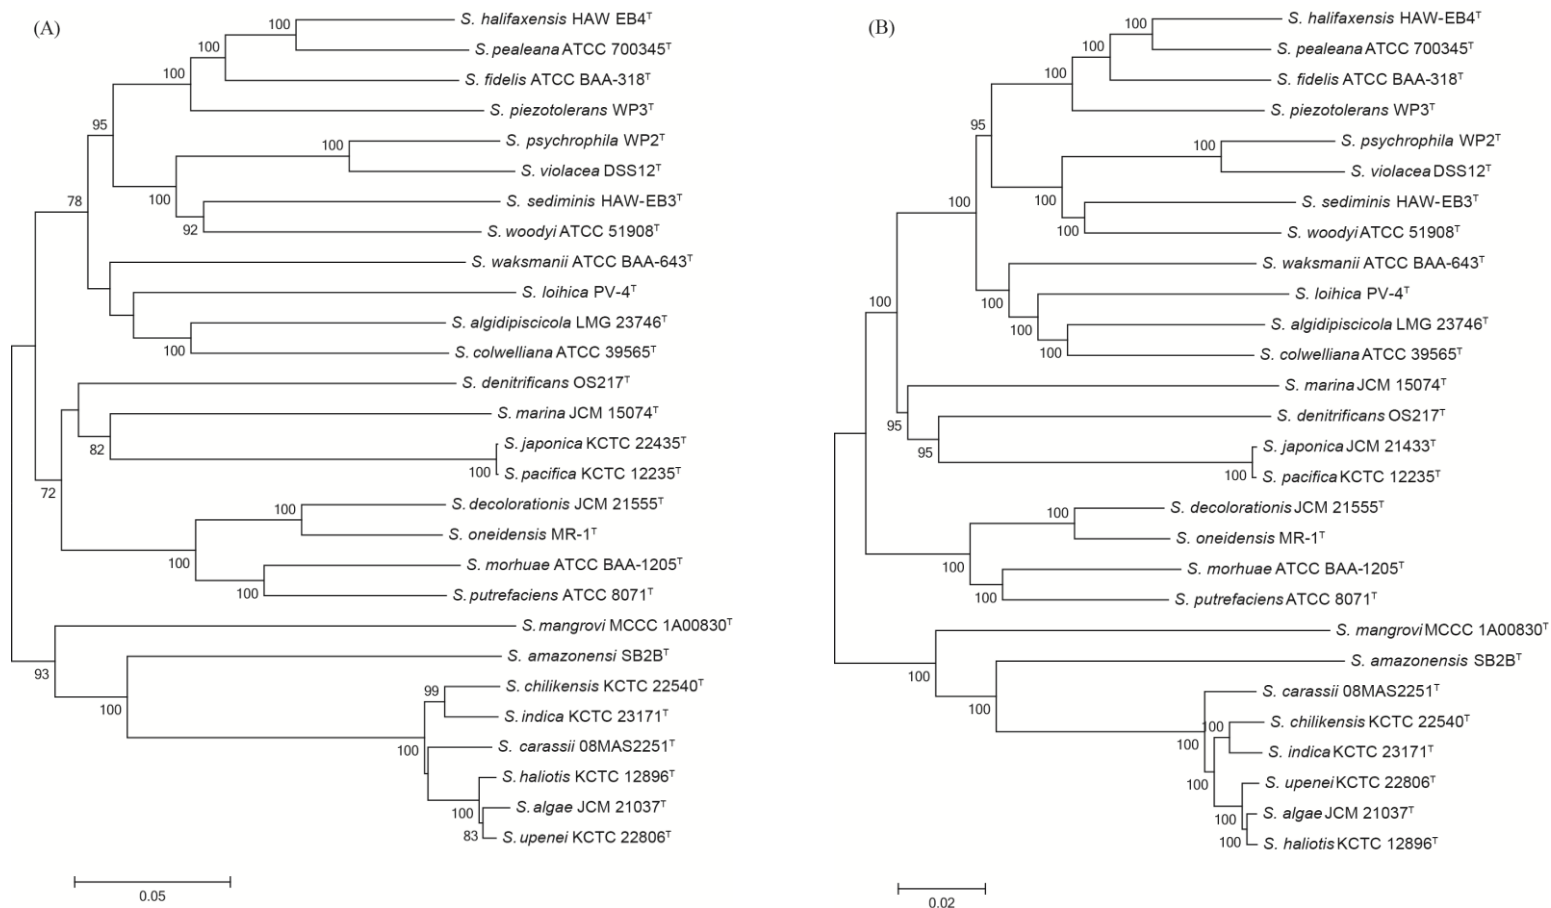

48

49 **Figure S3.** Phylogenetic trees reconstructed by the neighbour-joining method for twenty-eight type *Shewanella* strains based on the  
 50 concatenated sequences of six HKGs (A) and core genes (B). Bootstrap values were calculated from 1000 replications and values >70 % were  
 51 shown at branch points. The scale bar indicates substitutions per site.

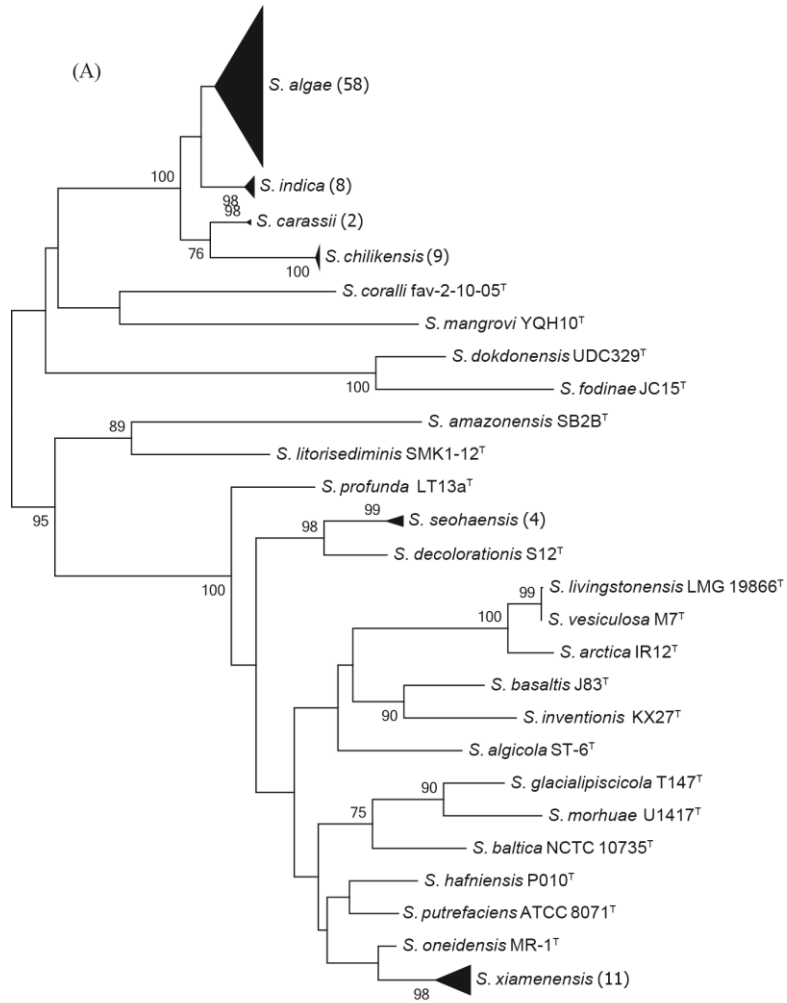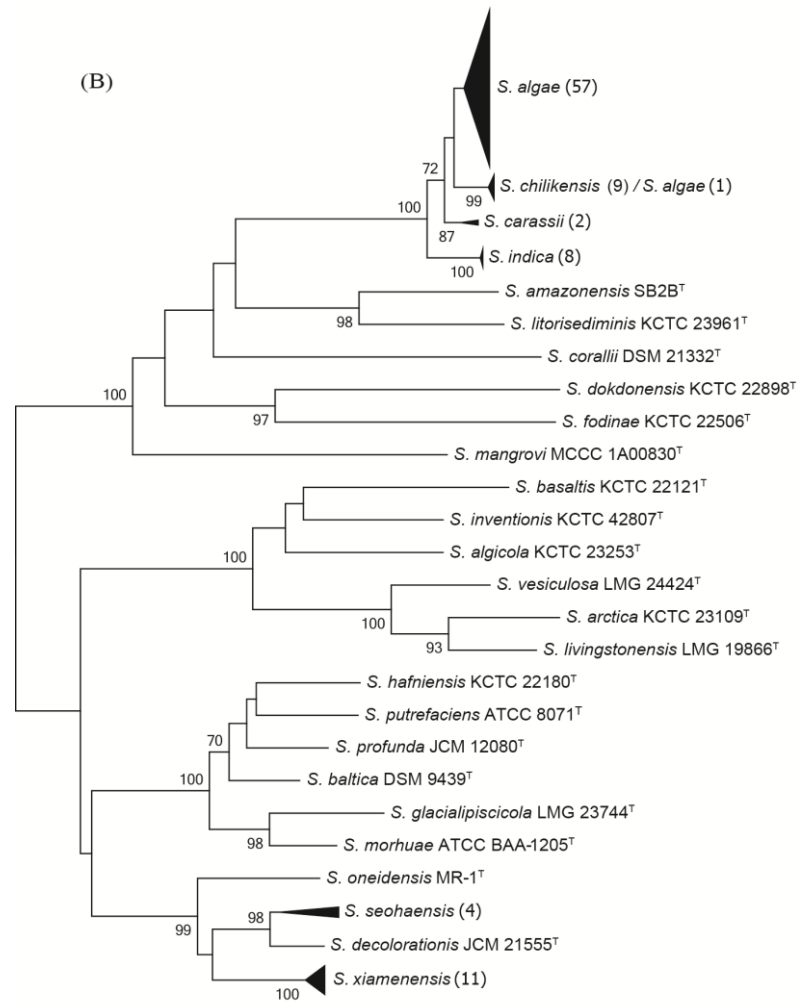



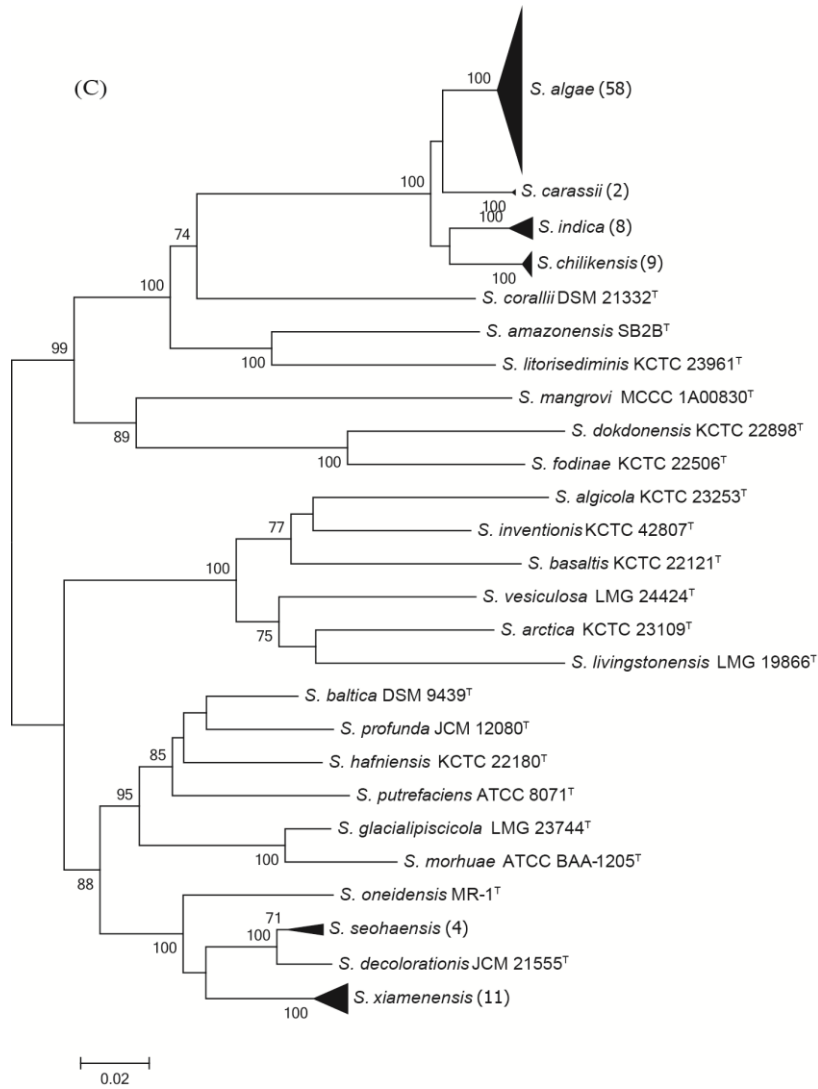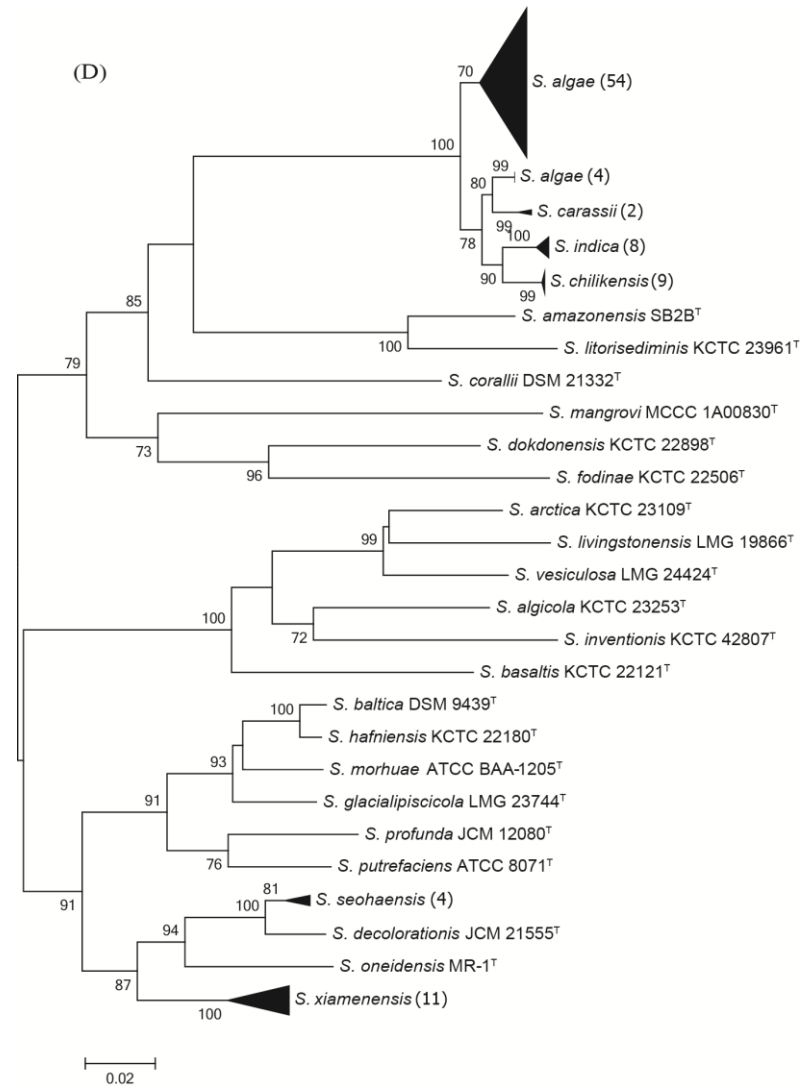

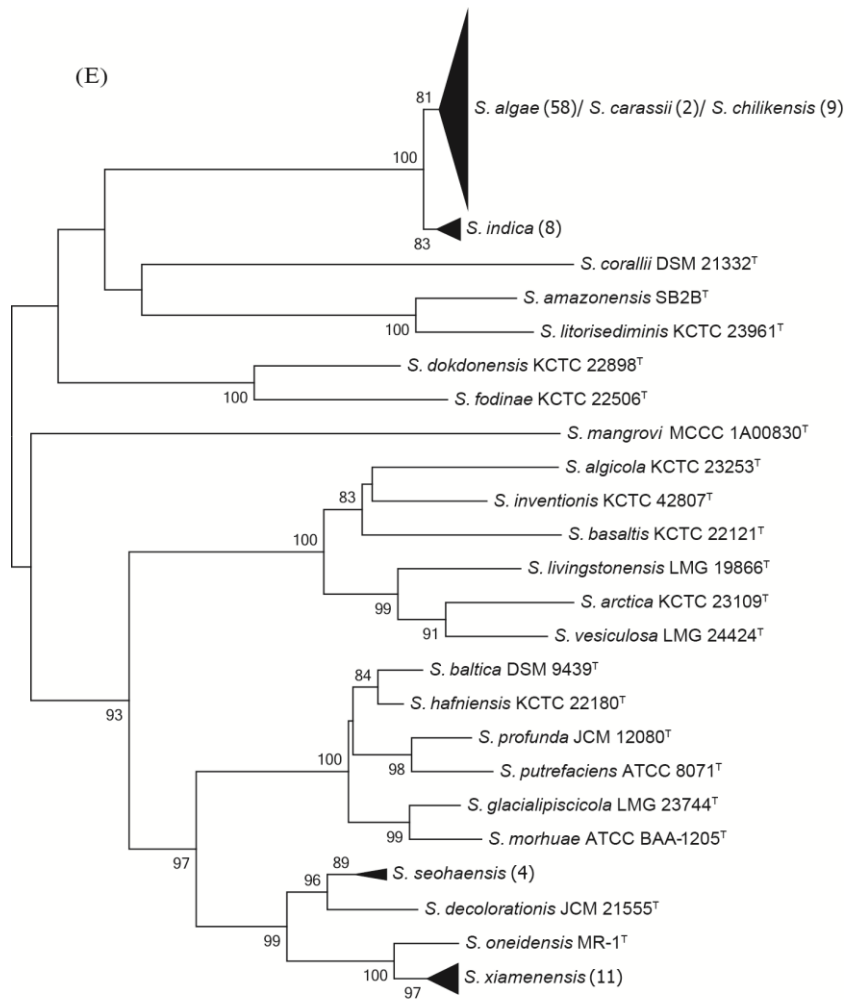

54

0.05

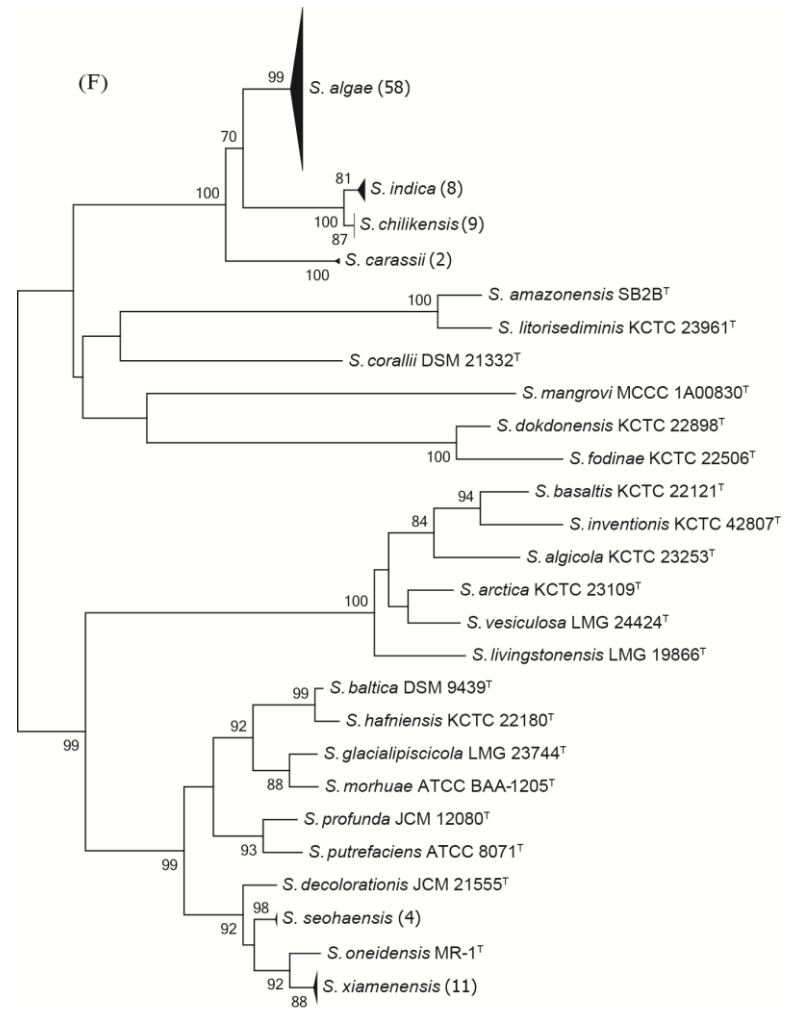

10

0.01

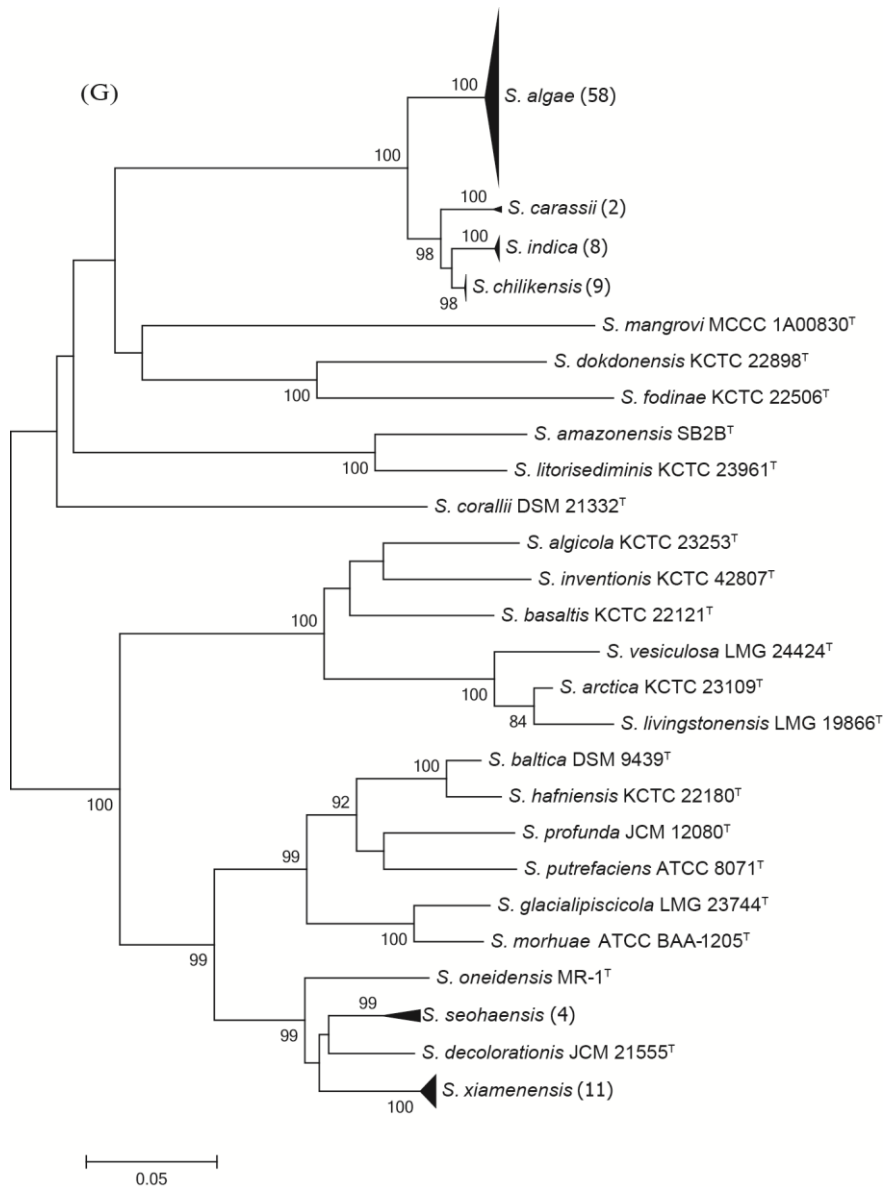

55

56 **Figure S4.** Phylogenetic trees reconstructed by the neighbour-joining method for  
 57 eighty-six *Shewanella* tested strains and twenty-six related *Shewanella* type strains.  
 58 The trees were based on the nucleotide sequences of the 16S rRNA gene (A), *gyrA*  
 59 (B), *gyrB* (C), *infB* (D), *recN* (E), *rpoA* (F) and *topA* (G). Strain number of tested  
 60 strains for each compact cluster (black triangle) was shown in parentheses. Bootstrap  
 61 values were calculated from 1000 replications and values >70 % were shown at  
 62 branch points. Bar, 0.01 substitutions per nucleotide position.

63 **Table S1.** Detailed information of fifty-nine *Shewanella* type strains involved in this study.

| Species                             | Strain                    | Isolation place                               | Isolation source                                    | Isolation year | Accession numbers |
|-------------------------------------|---------------------------|-----------------------------------------------|-----------------------------------------------------|----------------|-------------------|
| <i>Shewanella aestuarii</i>         | JCM 17801 <sup>T</sup>    | Suncheon bay, Korea                           | A tidal flat                                        | 2011           | -                 |
| <i>Shewanella algae</i>             | JCM 21037 <sup>T</sup>    | Japan                                         | Red alga                                            | 1990           | BALO00000000      |
| <i>Shewanella algicola</i>          | KCTC 23253 <sup>T</sup>   | Jeju Island, Korea                            | Brown alga, <i>Sargassum thunbergii</i>             | -              | -                 |
| <i>Shewanella algidipiscicola</i>   | LMG 23746 <sup>T</sup>    | Baltic Sea, Denmark                           | Plaice                                              | 2001           | QPQT00000000      |
| <i>Shewanella amazonensis</i> *     | SB2B <sup>T</sup>         | Brazil                                        | Mud flat sediment                                   | 1996           | CP000507          |
| <i>Shewanella aquimarina</i>        | JCM 12193 <sup>T</sup>    | Yellow Sea, Korea                             | Seawater                                            | -              | -                 |
| <i>Shewanella arctica</i>           | KCTC 23109 <sup>T</sup>   | Tempelfjorden, Norwegian Svalbard archipelago | Arctic marine sediment                              | -              | -                 |
| <i>Shewanella baltica</i>           | DSM 9439 <sup>T</sup>     | Japan                                         | Oil brine                                           | 1998           | -                 |
| <i>Shewanella basaltis</i>          | KCTC 22121 <sup>T</sup>   | Jeju Island, Korea                            | Marine black sand                                   | -              | -                 |
| <i>Shewanella benthica</i>          | DSM 8812 <sup>T</sup>     | Walvis Ridge, South Atlantic Ocean            | The intestine of holothurian                        | -              | -                 |
| <i>Shewanella carassii</i>          | 08MAS2251 <sup>T</sup>    | Anhui, China                                  | Surface of crucian carp, <i>Carassius carassius</i> | 2008           | NGVS00000000      |
| <i>Shewanella chilikensis</i>       | KCTC 22540 <sup>T</sup>   | Orissa, India                                 | Sediment of a lagoon                                | 2007           | NIJM00000000      |
| <i>Shewanella colwelliana</i> *     | ATCC 39565 <sup>T</sup>   | MD, USA                                       | Marine invertebrate                                 | 1988           | JAEC00000000      |
| <i>Shewanella corallii</i>          | DSM 21332 <sup>T</sup>    | Red Sea, Israel                               | A coral                                             | 2005           | -                 |
| <i>Shewanella decolorationis</i>    | JCM 21555 <sup>T</sup>    | Guangzhou, China                              | Activated sludge                                    | 2002           | AXZL00000000      |
| <i>Shewanella denitrificans</i> *   | OS217 <sup>T</sup>        | Baltic Sea                                    | Oxic-anoxic interface of the Gotland Deep           | 1986           | CP000302          |
| <i>Shewanella dokdonensis</i>       | KCTC 22898 <sup>T</sup>   | East Sea, Korea                               | Seawater                                            | 2006           | -                 |
| <i>Shewanella electrodiphila</i>    | DSM 24955 <sup>T</sup>    | Mid-Atlantic Ridge                            | Deep-sea sediment                                   | 2007           | -                 |
| <i>Shewanella fidelis</i> *         | ATCC BAA-318 <sup>T</sup> | the South China Sea, China                    | Sediment                                            | 1998           | JADX00000000      |
| <i>Shewanella fodinae</i>           | KCTC 22506 <sup>T</sup>   | Andhra Pradesh, India                         | A coal mine sludge                                  | 2007           | -                 |
| <i>Shewanella gaetbuli</i>          | KCTC 22431 <sup>T</sup>   | Korea                                         | A tidal flat                                        | -              | -                 |
| <i>Shewanella gelidii</i>           | MCCC 1K00697 <sup>T</sup> | Yellow Sea, China                             | Red alga, <i>Gelidium amansii</i>                   | 2014           | -                 |
| <i>Shewanella glacialipiscicola</i> | LMG 23744 <sup>T</sup>    | Baltic Sea, Denmark                           | Cod                                                 | 1996           | -                 |
| <i>Shewanella hafniensis</i>        | KCTC 22180 <sup>T</sup>   | Baltic Sea, Denmark                           | Cod                                                 | 2001           | -                 |
| <i>Shewanella halifaxensis</i> *    | HAW-EB4 <sup>T</sup>      | Emerald Basin, Atlantic Ocean                 | Sediment                                            | -              | CP000931          |
| <i>Shewanella haliotis</i>          | KCTC 12896 <sup>T</sup>   | South Sea, Korea                              | Abalone, <i>Haliotis discus hannai</i>              | 2006           | BALL00000000      |
| <i>Shewanella hanedai</i>           | DSM 6066 <sup>T</sup>     | Arctic Ocean                                  | Marine sediment                                     | -              | -                 |
| <i>Shewanella indica</i>            | KCTC23171 <sup>T</sup>    | Karwar jetty, India                           | Sediment of the Arabian Sea                         | 2006           | NIJK00000000      |
| <i>Shewanella intestini</i>         | MCCC 1A01895 <sup>T</sup> | Fujian, China                                 | The intestine of abalone                            | 2015           | -                 |

|                                   |                               |                                      |                                                                     |      |              |
|-----------------------------------|-------------------------------|--------------------------------------|---------------------------------------------------------------------|------|--------------|
| <i>Shewanella inventionis</i>     | KCTC 42807 <sup>T</sup>       | Okinawa Trough                       | Deep-sea sediment                                                   | 2014 | -            |
| <i>Shewanella japonica</i> *      | KCTC 22435 <sup>T</sup>       | Troitsa Bay, Japan                   | Seawater                                                            | 1994 | CP020472     |
| <i>Shewanella kaireitica</i>      | DSM 17170 <sup>T</sup>        | Suruga Bay, Japan                    | Deep-sea sediment                                                   | -    | -            |
| <i>Shewanella litorisediminis</i> | KCTC 23961 <sup>T</sup>       | Saemankum, Korea                     | A tidal flat sediment                                               | -    | -            |
| <i>Shewanella livingstonensis</i> | LMG 19866 <sup>T</sup>        | Johnson's Dock, Antarctica           | Water                                                               | -    | -            |
| <i>Shewanella loihica</i> *       | PV-4 <sup>T</sup>             | South Rift of Loihi Seamount, Hawaii | Microbial mats                                                      | -    | CP000606     |
| <i>Shewanella mangrovi</i>        | MCCC 1A00830 <sup>T</sup>     | Fujian, China                        | Mangrove sediment                                                   | 2013 | JPEO00000000 |
| <i>Shewanella marina</i> *        | JCM 15074 <sup>T</sup>        | South Sea, Korea                     | Seawater                                                            | -    | BALM00000000 |
| <i>Shewanella marinintestina</i>  | JCM 11558 <sup>T</sup>        | Yokohama, Japan                      | Squid body                                                          | 1994 | -            |
| <i>Shewanella marisflavi</i>      | JCM 12192 <sup>T</sup>        | Yellow Sea, Korea                    | Seawater                                                            | -    | -            |
| <i>Shewanella morhuae</i> *       | ATCC<br>BAA-1205 <sup>T</sup> | Baltic Sea, Denmark                  | Cod                                                                 | 1996 | FTNN00000000 |
| <i>Shewanella olleyana</i>        | LMG 21437 <sup>T</sup>        | Tasmania, Australia                  | Saline waters of estuary                                            | 1998 | -            |
| <i>Shewanella oneidensis</i> *    | MR-1 <sup>T</sup>             | NY, USA                              | Sediment                                                            | -    | AE014299     |
| <i>Shewanella pacifica</i>        | KCTC 12235 <sup>T</sup>       | Chazhma Bay, Japan                   | Seawater                                                            | -    | QPQU00000000 |
| <i>Shewanella pealeana</i> *      | ATCC 700345 <sup>T</sup>      | -                                    | Squid, <i>Loligo pealei</i>                                         | -    | CP000851     |
| <i>Shewanella piezotolerans</i> * | WP3 <sup>T</sup>              | Pacific Ocean                        | Deep-sea sediment                                                   | -    | CP000472     |
| <i>Shewanella pneumatophori</i>   | KCTC 23973 <sup>T</sup>       | Japan                                | The intestines of Pacific mackerel, <i>Pneumatophorus japonicus</i> | 1987 | -            |
| <i>Shewanella profunda</i>        | JCM 12080 <sup>T</sup>        | Pacific Ocean                        | Deep marine sediment                                                | 2000 | -            |
| <i>Shewanella psychrophila</i> *  | WP2 <sup>T</sup>              | Pacific Ocean                        | Deep-sea sediment                                                   | -    | CP014782     |
| <i>Shewanella putrefaciens</i>    | ATCC 8071 <sup>T</sup>        | England                              | Butter                                                              | 1931 | BCUO00000000 |
| <i>Shewanella sairae</i>          | MCCC 1A01705 <sup>T</sup>     | Pacific Ocean                        | Saury intestine                                                     | 1995 | -            |
| <i>Shewanella schlegeliana</i>    | JCM 11561 <sup>T</sup>        | Hiroshima, Japan                     | Black porgy intestine                                               | 1998 | -            |
| <i>Shewanella sediminis</i> *     | HAW-EB3 <sup>T</sup>          | Halifax Harbour, Atlantic Ocean      | Marine sediment                                                     | -    | CP000821     |
| <i>Shewanella seohaensis</i>      | KCTC 23556 <sup>T</sup>       | Saemankum, Korea                     | A tidal flat sediment                                               | -    | -            |
| <i>Shewanella upenei</i>          | KCTC22806 <sup>T</sup>        | South Sea, Korea                     | Bensasi goatfish, <i>Upeneus bensasi</i>                            | -    | NIJL00000000 |
| <i>Shewanella vesiculosa</i>      | LMG 24424 <sup>T</sup>        | Deception Island                     | Marine sediments                                                    | -    | -            |
| <i>Shewanella violacea</i> *      | DSS12 <sup>T</sup>            | Ryukyu Trench                        | Deep-sea sediment                                                   | -    | AP011177     |
| <i>Shewanella waksmanii</i> *     | ATCC BAA-643 <sup>T</sup>     | Troitsa Bay, Japan                   | A sipuncula, <i>Phascolosoma japonicum</i>                          | 1997 | JAEH00000000 |
| <i>Shewanella woodyi</i> *        | ATCC 51908 <sup>T</sup>       | Alboran Sea                          | Detritus                                                            | -    | CP000961     |
| <i>Shewanella xiamenensis</i>     | MCCC 1A00763 <sup>T</sup>     | Fujian, China                        | Coastal sea sediment                                                | -    | -            |

64 \* Genomes of type strains were used for primers design and sequences analyses.

65

**Table S2.** The GenBank accession numbers of 16S rRNA gene and individual HKGs sequences used in this study.

| No. | Species                   | Strain                                                                                                                                                                                               | 16S rRNA | <i>gyrA</i>  | <i>gyrB</i> | <i>infB</i> | <i>recN</i> | <i>rpoA</i> | <i>topA</i> |
|-----|---------------------------|------------------------------------------------------------------------------------------------------------------------------------------------------------------------------------------------------|----------|--------------|-------------|-------------|-------------|-------------|-------------|
| 1   | <i>S. aestuarii</i>       | JCM 17801 <sup>T</sup> = KACC 16187 <sup>T</sup> = SC18 <sup>T</sup>                                                                                                                                 | JF751044 | MH090144     | KC175545    | MH090203    | MH090245    | MH090287    | MH090329    |
| 2   | <i>S. algae</i>           | JCM 21037 <sup>T</sup> = NBRC 103173 <sup>T</sup> = DSM 9167 <sup>T</sup> = CIP 106454 <sup>T</sup> = CCUG 39064 <sup>T</sup> = ATCC 51192 <sup>T</sup> = IAM 14159 <sup>T</sup> = OK-1 <sup>T</sup> | AF005249 | MH090145     | AF005686    | MH090204    | MH090246    | MH090288    | MH090330    |
| 3   | <i>S. algicola</i>        | KCTC 23253 <sup>T</sup> = JCM 31091 <sup>T</sup> = ST-6 <sup>T</sup>                                                                                                                                 | FJ903681 | MH090146     | KP748519    | MH090205    | MH090247    | MH090289    | MH090331    |
| 4   | <i>S. algidipiscicola</i> | LMG 23746 <sup>T</sup> = NBRC 102032 <sup>T</sup> = S13 <sup>T</sup>                                                                                                                                 | AB205570 | MH090147     | MH090186    | MH090206    | MH090248    | MH090290    | MH090332    |
| 5   | <i>S. amazonensis</i>     | SB2B <sup>T</sup> = CIP 105786 <sup>T</sup> = ATCC 700329 <sup>T</sup>                                                                                                                               | AF005248 | CP000507     |             |             |             |             |             |
| 6   | <i>S. aquimarina</i>      | JCM 12193 <sup>T</sup> = KCCM 41821 <sup>T</sup> = SW-120 <sup>T</sup>                                                                                                                               | AY485225 | MH090148     | FJ589042    | MH090207    | MH090249    | MH090291    | MH090333    |
| 7   | <i>S. arctica</i>         | KCTC 23109 <sup>T</sup> = JCM 16723 <sup>T</sup> = IR12 <sup>T</sup>                                                                                                                                 | GU564402 | MH090149     | MH090187    | MH090208    | MH090250    | MH090292    | MH090334    |
| 8   | <i>S. baltica</i>         | DSM 9439 <sup>T</sup> = LMG 2250 <sup>T</sup> = CIP 105850 <sup>T</sup> = CCUG 39356 <sup>T</sup> = CECT 323 <sup>T</sup> = IAM 1477 <sup>T</sup> = NCTC 10735 <sup>T</sup>                          | AJ000214 | MH090150     | AB231331    | MH090209    | MH090251    | MH090293    | MH090335    |
| 9   | <i>S. basaltis</i>        | KCTC 22121 <sup>T</sup> = JCM 14937 <sup>T</sup> = J83 <sup>T</sup>                                                                                                                                  | EU143361 | MH090151     | FJ589041    | MH090210    | MH090252    | MH090294    | MH090336    |
| 10  | <i>S. benthica</i>        | DSM 8812 <sup>T</sup> = ATCC 43992 <sup>T</sup> = W 145 <sup>T</sup>                                                                                                                                 | X82131   | MH090152     | MH090188    | MH090211    | MH090253    | MH090295    | MH090337    |
| 11  | <i>S. carassii</i>        | 08MAS2251 <sup>T</sup> = DSM 104682 <sup>T</sup> = CGMCC 1.16033 <sup>T</sup>                                                                                                                        | MF164482 | MH090153     | MF164484    | MH090212    | MH090254    | MH090296    | MH090338    |
| 12  | <i>S. chilikensis</i>     | KCTC 22540 <sup>T</sup> = NBRC 105217 <sup>T</sup> = CCUG 57101 <sup>T</sup> = JC5 <sup>T</sup>                                                                                                      | FM210033 | MH090154     | HM016091    | MH090213    | MH090255    | MH090297    | MH090339    |
| 13  | <i>S. colwelliana</i>     | ATCC 39565 <sup>T</sup> = LST-W <sup>T</sup>                                                                                                                                                         | AY653177 | JAEC00000000 |             |             |             |             |             |
| 14  | <i>S. corallii</i>        | DSM 21332 <sup>T</sup> = LMG 24563 <sup>T</sup> = fav-2-10-05 <sup>T</sup>                                                                                                                           | FJ041083 | MH090155     | MH090189    | MH090214    | MH090256    | MH090298    | MH090340    |
| 15  | <i>S. decolorationis</i>  | JCM 21555 <sup>T</sup> = CCTCC M 203093 <sup>T</sup> = NBRC 103170 <sup>T</sup> = IAM 15094 <sup>T</sup> = S12 <sup>T</sup>                                                                          | AJ609571 | MH090156     | MH090190    | MH090215    | MH090257    | MH090299    | MH090341    |
| 16  | <i>S. denitrificans</i>   | OS217 <sup>T</sup> = LMG 21692 <sup>T</sup> = DSM 15013 <sup>T</sup>                                                                                                                                 | AJ311964 | CP000302     |             |             |             |             |             |
| 17  | <i>S. dokdonensis</i>     | KCTC 22898 <sup>T</sup> = DSM 23626 <sup>T</sup> = UDC329 <sup>T</sup>                                                                                                                               | GQ245918 | MH090157     | GQ132057    | MH090216    | MH090258    | MH090300    | MH090342    |
| 18  | <i>S. electrodiphila</i>  | DSM 24955 <sup>T</sup> = ATCC BAA-2408 <sup>T</sup> = MAR441 <sup>T</sup>                                                                                                                            | FR744784 | MH090158     | MH090191    | MH090217    | MH090259    | MH090301    | MH090343    |
| 19  | <i>S. fidelis</i>         | ATCC BAA-318 <sup>T</sup> = LMG 20552 <sup>T</sup> = KMM                                                                                                                                             | AF420312 | JADX00000000 |             |             |             |             |             |

|    |                             |                                                                                                                                                                                                     |          |              |                  |          |          |          |          |
|----|-----------------------------|-----------------------------------------------------------------------------------------------------------------------------------------------------------------------------------------------------|----------|--------------|------------------|----------|----------|----------|----------|
|    |                             | 3582 <sup>T</sup>                                                                                                                                                                                   |          |              |                  |          |          |          |          |
| 20 | <i>S. fodinae</i>           | KCTC 22506 <sup>T</sup> = NBRC 105216 <sup>T</sup> = CCUG 57102 <sup>T</sup> = JC15 <sup>T</sup>                                                                                                    | FM203122 | MH090159     | MH090192         | MH090218 | MH090260 | MH090302 | MH090344 |
| 21 | <i>S. gaetbuli</i>          | KCTC 22431 <sup>T</sup> = KCCM 41648 <sup>T</sup> = JCM 11814 <sup>T</sup> = TF-27 <sup>T</sup>                                                                                                     | AY190533 | MH090160     | KC175546         | MH090219 | MH090261 | MH090303 | MH090345 |
| 22 | <i>S. gelidii</i>           | MCCC 1K00697 <sup>T</sup> = KCTC 42663 <sup>T</sup> = JCM 30804 <sup>T</sup> = RZB5-4 <sup>T</sup>                                                                                                  | KR080702 | MH090161     | KT899956         | MH090220 | MH090262 | MH090304 | MH090346 |
| 23 | <i>S. glacialipiscicola</i> | LMG 23744 <sup>T</sup> = NBRC 102030 <sup>T</sup> = T147 <sup>T</sup>                                                                                                                               | AB205571 | MH090162     | MH090193         | MH090221 | MH090263 | MH090305 | MH090347 |
| 24 | <i>S. hafniensis</i>        | KCTC 22180 <sup>T</sup> = NBRC 100975 <sup>T</sup> = ATCC BAA-1207 <sup>T</sup> = P010 <sup>T</sup>                                                                                                 | AB205566 | MH090163     | MH090194         | MH090222 | MH090264 | MH090306 | MH090348 |
| 25 | <i>S. halifaxensis</i>      | HAW-EB4 <sup>T</sup> = DSM 17350 <sup>T</sup> = NCIMB 14093 <sup>T</sup>                                                                                                                            | AY579751 | CP000931     |                  |          |          |          |          |
| 26 | <i>S. haliotis</i>          | KCTC 12896 <sup>T</sup> = JCM 14758 <sup>T</sup> = DW01 <sup>T</sup>                                                                                                                                | EF178282 | MH090164     | HM016089         | MH090223 | MH090265 | MH090307 | MH090349 |
| 27 | <i>S. hanedai</i>           | DSM 6066 <sup>T</sup> = JCM 20706 <sup>T</sup> = NBRC 102223 <sup>T</sup> = LMG 19004 <sup>T</sup> = CIP 103207 <sup>T</sup> = CCUG 16097 <sup>T</sup> = ATCC 33224 <sup>T</sup> = 281 <sup>T</sup> | U91590   | MH090165     | AF005693         | MH090224 | MH090266 | MH090308 | MH090350 |
| 28 | <i>S. indica</i>            | KCTC 23171 <sup>T</sup> = NCIM 5388 <sup>T</sup> = BCC 41031 <sup>T</sup> = KJW27 <sup>T</sup>                                                                                                      | HM016084 | MH090166     | HM016092         | MH090225 | MH090267 | MH090309 | MH090351 |
| 29 | <i>S. intestini</i>         | MCCC 1A01895 <sup>T</sup> = KCTC 52125 <sup>T</sup> = XMDDZSB0408 <sup>T</sup>                                                                                                                      | KU663649 | MH090167     | MH090195         | MH090226 | MH090268 | MH090310 | MH090352 |
| 30 | <i>S. inventionis</i>       | KCTC 42807 <sup>T</sup> = CGMCC 1.15339 <sup>T</sup> = KX27 <sup>T</sup>                                                                                                                            | KT781407 | MH090168     | MH090196         | MH090227 | MH090269 | MH090311 | MH090353 |
| 31 | <i>S. japonica</i>          | KCTC 22435 <sup>T</sup> = JCM 21433 <sup>T</sup> = NBRC 103171 <sup>T</sup> = LMG 19691 <sup>T</sup> = CIP 106860 <sup>T</sup> = ATCC BAA-316 <sup>T</sup> = KMM 3299 <sup>T</sup>                  | AF145921 | CP020472     |                  |          |          |          |          |
| 32 | <i>S. kaireitica</i>        | DSM 17170 <sup>T</sup> = JCM 11836 <sup>T</sup> = c931 <sup>T</sup>                                                                                                                                 | AB094598 | MH090169     | MH090197         | MH090228 | MH090270 | MH090312 | MH090354 |
| 33 | <i>S. litorisediminis</i>   | KCTC 23961 <sup>T</sup> = CCUG 62411 <sup>T</sup> = SMK1-12 <sup>T</sup>                                                                                                                            | JQ824139 | MH090170     | JQ824140         | MH090229 | MH090271 | MH090313 | MH090355 |
| 34 | <i>S. livingstonensis</i>   | LMG 19866 <sup>T</sup> = CECT 5933 <sup>T</sup> = NF22 <sup>T</sup>                                                                                                                                 | AJ300834 | MH090171     | MH090198         | MH090230 | MH090272 | MH090314 | MH090356 |
| 35 | <i>S. loihica</i>           | PV-4 <sup>T</sup> = DSM 17748 <sup>T</sup> = ATCC BAA-1088 <sup>T</sup>                                                                                                                             | DQ286387 | CP000606     |                  |          |          |          |          |
| 36 | <i>S. mangrovi</i>          | MCCC 1A00830 <sup>T</sup> = JCM 30121 <sup>T</sup> = YQH10 <sup>T</sup>                                                                                                                             | KJ751544 | MH090172     | JPEO01000<br>023 | MH090231 | MH090273 | MH090315 | MH090357 |
| 37 | <i>S. marina</i>            | JCM 15074 <sup>T</sup> = KCTC 22185 <sup>T</sup> = C4 <sup>T</sup>                                                                                                                                  | EU290154 | BALM00000000 |                  |          |          |          |          |

|    |                          |                                                                                                                                                                                                                                                                                                                                       |          |              |          |          |          |          |          |
|----|--------------------------|---------------------------------------------------------------------------------------------------------------------------------------------------------------------------------------------------------------------------------------------------------------------------------------------------------------------------------------|----------|--------------|----------|----------|----------|----------|----------|
| 38 | <i>S. marinintestina</i> | JCM 11558 <sup>T</sup> = LMG 21403 <sup>T</sup> = IK-1 <sup>T</sup>                                                                                                                                                                                                                                                                   | AB081757 | MH090173     | AB081763 | MH090232 | MH090274 | MH090316 | MH090358 |
| 39 | <i>S. marisflavi</i>     | JCM 12192 <sup>T</sup> = KCCM 41822 <sup>T</sup> = SW-117 <sup>T</sup>                                                                                                                                                                                                                                                                | AY485224 | MH090174     | FJ589037 | MH090233 | MH090275 | MH090317 | MH090359 |
| 40 | <i>S. morhuae</i>        | ATCC BAA-1205 <sup>T</sup> = NBRC 100978 <sup>T</sup> = U1417 <sup>T</sup>                                                                                                                                                                                                                                                            | AB205576 | FTNN00000000 |          |          |          |          |          |
| 41 | <i>S. olleyana</i>       | LMG 21437 <sup>T</sup> = ACAM 644 <sup>T</sup> = ACEM 9 <sup>T</sup>                                                                                                                                                                                                                                                                  | AF295592 | MH090175     | MH090199 | MH090234 | MH090276 | MH090318 | MH090360 |
| 42 | <i>S. oneidensis</i>     | MR-1 <sup>T</sup> = LMG 19005 <sup>T</sup> = CIP 106686 <sup>T</sup> = ATCC 700550 <sup>T</sup>                                                                                                                                                                                                                                       | AF005251 | AE014299     |          |          |          |          |          |
| 43 | <i>S. pacifica</i>       | KCTC 12235 <sup>T</sup> = DSM 15445 <sup>T</sup> = CIP 107849 <sup>T</sup> = KMM 3597 <sup>T</sup> = R10SW1 <sup>T</sup>                                                                                                                                                                                                              | AF500075 | MH090176     | MH090200 | MH090235 | MH090277 | MH090319 | MH090361 |
| 44 | <i>S. pealeana</i>       | ATCC 700345 <sup>T</sup> = CIP 106450 <sup>T</sup> = ANG-SQ1 <sup>T</sup>                                                                                                                                                                                                                                                             | AF011335 | CP000851     |          |          |          |          |          |
| 45 | <i>S. piezotolerans</i>  | WP3 <sup>T</sup> = CGMCC 1.6160 <sup>T</sup> = JCM 13877 <sup>T</sup>                                                                                                                                                                                                                                                                 | AJ551090 | CP000472     |          |          |          |          |          |
| 46 | <i>S. pneumatophori</i>  | KCTC 23973 <sup>T</sup> = JCM 13187 <sup>T</sup> = NCIMB 14060 <sup>T</sup> = SCRC-2738 <sup>T</sup>                                                                                                                                                                                                                                  | AB204519 | MH090177     | MH090201 | MH090236 | MH090278 | MH090320 | MH090362 |
| 47 | <i>S. profunda</i>       | JCM 12080 <sup>T</sup> = DSM 15900 <sup>T</sup> = LT13a <sup>T</sup>                                                                                                                                                                                                                                                                  | AY445591 | MH090178     | FJ589036 | MH090237 | MH090279 | MH090321 | MH090363 |
| 48 | <i>S. psychrophila</i>   | WP2 <sup>T</sup> = CGMCC 1.6159 <sup>T</sup> = JCM 13876 <sup>T</sup>                                                                                                                                                                                                                                                                 | AJ551089 | CP014782     |          |          |          |          |          |
| 49 | <i>S. putrefaciens</i>   | ATCC 8071 <sup>T</sup> = JCM 9294 <sup>T</sup> = JCM 20190 <sup>T</sup> = LMG 2268 <sup>T</sup> = DSM 6067 <sup>T</sup> = CIP 80.40 <sup>T</sup> = CCUG 13452 D <sup>T</sup> = CFBP 3033 <sup>T</sup> = CFBP 3034 <sup>T</sup> = NCTC 12960 <sup>T</sup> = NBRC 3908 <sup>T</sup> = NCIMB 10471 <sup>T</sup> = Hammer 95 <sup>T</sup> | X82133   | MH090179     | AF005669 | MH090238 | MH090280 | MH090322 | MH090364 |
| 50 | <i>S. sairae</i>         | MCCC 1A01705 <sup>T</sup> = JCM 11563 <sup>T</sup> = LMG 21408 <sup>T</sup> = SM2-1 <sup>T</sup>                                                                                                                                                                                                                                      | AB081762 | MH090180     | AB081768 | MH090239 | MH090281 | MH090323 | MH090365 |
| 51 | <i>S. schlegeliana</i>   | JCM 11561 <sup>T</sup> = LMG 21406 <sup>T</sup> = HRKA1 <sup>T</sup>                                                                                                                                                                                                                                                                  | AB081760 | MH090181     | AB081766 | MH090240 | MH090282 | MH090324 | MH090366 |
| 52 | <i>S. sediminis</i>      | HAW-EB3 <sup>T</sup> = DSM 17055 <sup>T</sup> = NCIMB 14036 <sup>T</sup>                                                                                                                                                                                                                                                              | AY579750 | CP000821     |          |          |          |          |          |
| 53 | <i>S. seohaensis</i>     | KCTC 23556 <sup>T</sup> = CCUG 60900 <sup>T</sup> = S7-3 <sup>T</sup>                                                                                                                                                                                                                                                                 | GU944672 | MH090182     | GU944673 | MH090241 | MH090283 | MH090325 | MH090367 |
| 54 | <i>S. upenei</i>         | KCTC 22806 <sup>T</sup> = CCUG 58400 <sup>T</sup> = 20-23R <sup>T</sup>                                                                                                                                                                                                                                                               | GQ260190 | MH090183     | GQ260193 | MH090242 | MH090284 | MH090326 | MH090368 |
| 55 | <i>S. vesiculosa</i>     | LMG 24424 <sup>T</sup> = CECT 7339 <sup>T</sup> = M7 <sup>T</sup>                                                                                                                                                                                                                                                                     | AM980877 | MH090184     | MH090202 | MH090243 | MH090285 | MH090327 | MH090369 |
| 56 | <i>S. violacea</i>       | DSS12 <sup>T</sup> = JCM 10179 <sup>T</sup> = LMG 19151 <sup>T</sup> = CIP 106290 <sup>T</sup>                                                                                                                                                                                                                                        | D21225   | AP011177     |          |          |          |          |          |
| 57 | <i>S. waksmanii</i>      | ATCC BAA-643 <sup>T</sup> = CIP 107701 <sup>T</sup> = KMM 3823 <sup>T</sup>                                                                                                                                                                                                                                                           | AY170366 | JAEH00000000 |          |          |          |          |          |



|    |                             |                                                                                                       |          |              |          |          |          |          |          |
|----|-----------------------------|-------------------------------------------------------------------------------------------------------|----------|--------------|----------|----------|----------|----------|----------|
| 58 | <i>S. woodyi</i>            | ATCC 51908 <sup>T</sup> = DSM 12036 <sup>T</sup> = CIP<br>105547 <sup>T</sup> = MS32 <sup>T</sup>     | AF003549 | CP000961     |          |          |          |          |          |
| 59 | <i>S. xiamenensis</i>       | MCCC 1A00763 <sup>T</sup> = CCTCC M 209017 <sup>T</sup> =<br>JCM 16212 <sup>T</sup> = S4 <sup>T</sup> | FJ589031 | MH090185     | FJ589040 | MH090244 | MH090286 | MH090328 | MH090370 |
| 60 | <i>Aeromonas hydrophila</i> | ATCC 7966 <sup>1</sup> = BCRC 13018 <sup>1</sup> = CCRC<br>13018 <sup>T</sup>                         | AY264937 | CP000462     |          |          |          |          |          |
| 61 | <i>Escherichia coli</i>     | JCM 1649 <sup>T</sup> = ATCC 11775 <sup>T</sup> = CCUG 24 <sup>T</sup>                                | AB242910 | BAIM00000000 |          |          |          |          |          |
| 62 | <i>Vibrio cholerae</i>      | ATCC 14035 <sup>1</sup> = CCUG 9118 A <sup>T</sup> = CECT<br>514 <sup>T</sup>                         | EF032498 | JHXR00000000 |          |          |          |          |          |

**Table S3.** The similarity matrix for twenty-eight type *Shewanella* strains based on *is*DDH (lower left) and MLSA (upper right).

| No. | species                   | 1    | 2    | 3    | 4    | 5    | 6    | 7    | 8    | 9    | 10   | 11   | 12   | 13   | 14   | 15   | 16   | 17   | 18   | 19   | 20   | 21   | 22   | 23   | 24   | 25   | 26   | 27   | 28   |  |
|-----|---------------------------|------|------|------|------|------|------|------|------|------|------|------|------|------|------|------|------|------|------|------|------|------|------|------|------|------|------|------|------|--|
| 1   | <i>S. algae</i>           |      | 75.3 | 79.9 | 95.6 | 95.5 | 73.9 | 77.4 | 75.3 | 74.2 | 74.8 | 98.5 | 94.8 | 73.5 | 77.7 | 76.2 | 74.0 | 76.4 | 76.9 | 73.6 | 74.1 | 73.9 | 75.0 | 76.2 | 74.9 | 98.7 | 75.2 | 74.9 | 74.3 |  |
| 2   | <i>S. algidipiscicola</i> | 18.5 |      | 75.7 | 75.7 | 75.4 | 85.4 | 78.0 | 77.9 | 80.2 | 80.2 | 75.5 | 75.4 | 77.9 | 81.2 | 75.1 | 77.9 | 77.7 | 77.7 | 77.9 | 80.1 | 79.3 | 79.4 | 78.2 | 79.3 | 75.5 | 78.4 | 80.8 | 79.4 |  |
| 3   | <i>S. amazonensi</i>      | 19.9 | 19.0 |      | 79.7 | 79.6 | 74.9 | 76.8 | 75.6 | 75.0 | 74.9 | 80.3 | 79.7 | 73.8 | 77.8 | 75.9 | 74.6 | 76.2 | 77.0 | 73.8 | 74.2 | 74.1 | 75.4 | 76.0 | 75.1 | 80.2 | 74.9 | 75.4 | 74.1 |  |
| 4   | <i>S. carassii</i>        | 51.5 | 18.5 | 19.9 |      | 95.7 | 74.5 | 77.4 | 75.5 | 75.0 | 75.4 | 96.0 | 95.7 | 73.6 | 77.9 | 76.7 | 74.4 | 77.0 | 77.0 | 73.6 | 75.0 | 74.2 | 75.4 | 76.7 | 75.0 | 95.8 | 75.6 | 75.5 | 74.6 |  |
| 5   | <i>S. chilikensis</i>     | 55.9 | 18.5 | 19.8 | 50.4 |      | 74.6 | 77.4 | 75.5 | 74.4 | 75.0 | 95.7 | 96.6 | 74.1 | 77.6 | 76.8 | 74.4 | 76.4 | 77.2 | 74.1 | 74.4 | 73.8 | 75.3 | 76.4 | 74.7 | 95.8 | 75.3 | 75.3 | 74.4 |  |
| 6   | <i>S. colwelliana</i>     | 18.1 | 20.8 | 17.8 | 18.1 | 18.1 |      | 77.2 | 77.3 | 79.5 | 79.7 | 74.3 | 74.7 | 78.4 | 80.7 | 75.3 | 77.7 | 77.4 | 77.3 | 78.4 | 79.5 | 79.7 | 79.4 | 78.1 | 79.4 | 74.4 | 79.1 | 81.2 | 80.3 |  |
| 7   | <i>S. decolorationis</i>  | 18.8 | 21.0 | 19.3 | 18.9 | 18.6 | 18.8 |      | 79.1 | 77.1 | 76.9 | 77.6 | 77.3 | 77.1 | 76.5 | 76.6 | 77.8 | 84.6 | 91.5 | 77.1 | 76.7 | 76.0 | 76.9 | 86.0 | 76.3 | 77.6 | 76.6 | 76.1 | 77.3 |  |
| 8   | <i>S. denitrificans</i>   | 20.4 | 20.5 | 22.0 | 20.8 | 19.9 | 19.6 | 21.0 |      | 77.3 | 77.0 | 75.7 | 76.0 | 79.0 | 75.8 | 74.6 | 78.3 | 79.0 | 79.7 | 79.0 | 77.4 | 77.6 | 75.9 | 79.2 | 76.7 | 75.6 | 76.0 | 77.4 | 75.9 |  |
| 9   | <i>S. fidelis</i>         | 18.5 | 20.5 | 18.6 | 18.8 | 18.5 | 19.5 | 19.1 | 20.0 |      | 86.4 | 74.6 | 74.5 | 78.5 | 77.7 | 75.0 | 78.5 | 76.7 | 77.1 | 78.5 | 86.6 | 84.0 | 79.5 | 77.5 | 80.3 | 74.5 | 79.0 | 79.8 | 80.8 |  |
| 10  | <i>S. halifaxensis</i>    | 20.6 | 20.3 | 21.6 | 20.4 | 19.7 | 19.6 | 19.9 | 21.8 | 22.0 |      | 75.2 | 75.4 | 78.3 | 78.3 | 75.0 | 78.5 | 76.9 | 77.4 | 78.3 | 90.2 | 84.3 | 79.9 | 77.3 | 80.7 | 75.2 | 79.3 | 78.9 | 81.3 |  |
| 11  | <i>S. haliotis</i>        | 84.6 | 18.8 | 20.0 | 51.7 | 56.1 | 18.1 | 18.9 | 20.4 | 18.4 | 20.4 |      | 95.2 | 73.8 | 78.1 | 76.6 | 74.2 | 76.5 | 77.0 | 73.8 | 74.6 | 74.2 | 75.3 | 76.7 | 75.0 | 99.0 | 75.5 | 75.1 | 74.6 |  |
| 12  | <i>S. indica</i>          | 55.3 | 18.5 | 20.0 | 51.2 | 64.0 | 18.3 | 18.9 | 20.1 | 18.6 | 20.6 | 55.3 |      | 73.8 | 77.7 | 76.7 | 74.3 | 76.4 | 77.1 | 73.9 | 74.5 | 74.0 | 75.1 | 76.7 | 74.8 | 95.0 | 75.0 | 75.6 | 74.6 |  |
| 13  | <i>S. japonica</i>        | 19.5 | 20.0 | 21.1 | 19.9 | 19.1 | 19.8 | 19.9 | 20.8 | 20.1 | 21.9 | 19.7 | 19.7 |      | 74.6 | 74.2 | 79.2 | 77.6 | 77.6 | 99.9 | 78.0 | 77.7 | 76.4 | 78.0 | 76.1 | 73.8 | 76.3 | 77.7 | 77.2 |  |
| 14  | <i>S. loihica</i>         | 20.2 | 20.0 | 20.3 | 19.9 | 19.7 | 19.2 | 19.8 | 21.9 | 19.3 | 20.9 | 20.0 | 20.0 | 22.7 |      | 75.4 | 75.1 | 75.4 | 76.9 | 74.6 | 77.6 | 77.8 | 79.4 | 76.0 | 78.5 | 78.0 | 78.8 | 79.5 | 79.2 |  |
| 15  | <i>S. mangrovi</i>        | 18.8 | 18.8 | 20.3 | 18.7 | 18.5 | 18.8 | 19.0 | 21.6 | 18.8 | 20.2 | 18.8 | 19.0 | 21.2 | 20.7 |      | 75.3 | 75.2 | 76.0 | 74.2 | 74.3 | 73.9 | 73.7 | 76.1 | 74.0 | 76.5 | 73.5 | 75.4 | 73.8 |  |
| 16  | <i>S. marina</i>          | 19.4 | 19.9 | 19.9 | 19.3 | 19.1 | 19.6 | 20.6 | 21.4 | 19.4 | 21.2 | 19.4 | 19.4 | 20.9 | 20.4 | 18.8 |      | 78.2 | 78.1 | 79.1 | 77.6 | 77.0 | 76.5 | 78.2 | 76.1 | 74.3 | 76.1 | 77.4 | 78.1 |  |
| 17  | <i>S. morhuae</i>         | 18.5 | 19.2 | 19.1 | 18.7 | 18.4 | 19.9 | 21.5 | 20.8 | 19.3 | 20.0 | 18.4 | 18.8 | 20.1 | 19.5 | 18.9 | 19.9 |      | 85.3 | 77.6 | 76.3 | 76.1 | 76.0 | 88.9 | 75.9 | 76.7 | 76.7 | 76.5 | 77.0 |  |
| 18  | <i>S. oneidensis</i>      | 19.1 | 19.6 | 20.1 | 19.4 | 19.1 | 18.7 | 29.7 | 23.1 | 19.2 | 20.4 | 19.3 | 19.0 | 20.9 | 20.4 | 20.1 | 21.2 | 21.5 |      | 77.6 | 76.8 | 76.0 | 76.5 | 86.5 | 75.9 | 77.3 | 76.4 | 76.9 | 76.7 |  |
| 19  | <i>S. pacifica</i>        | 18.1 | 19.5 | 18.3 | 18.6 | 18.3 | 19.9 | 19.1 | 19.5 | 20.0 | 20.0 | 18.2 | 18.5 | 88.9 | 19.7 | 19.2 | 19.5 | 19.9 | 19.7 |      | 78.0 | 77.7 | 76.4 | 77.9 | 76.0 | 73.8 | 76.3 | 77.6 | 77.2 |  |
| 20  | <i>S. pealeana</i>        | 20.2 | 20.4 | 22.1 | 20.7 | 19.3 | 19.8 | 20.3 | 23.3 | 22.0 | 25.5 | 20.0 | 20.0 | 21.9 | 20.6 | 19.9 | 21.3 | 20.7 | 20.8 | 20.2 |      | 84.4 | 79.8 | 76.5 | 81.4 | 74.4 | 79.1 | 78.5 | 80.6 |  |
| 21  | <i>S. piezotolerans</i>   | 19.6 | 20.1 | 21.0 | 19.7 | 19.3 | 19.9 | 19.7 | 21.2 | 20.4 | 21.3 | 19.5 | 19.5 | 22.0 | 20.5 | 20.4 | 21.1 | 19.9 | 20.3 | 20.4 | 21.4 |      | 79.1 | 76.0 | 79.5 | 74.2 | 78.5 | 79.3 | 80.5 |  |
| 22  | <i>S. psychrophila</i>    | 19.9 | 19.9 | 21.2 | 20.0 | 19.4 | 19.2 | 19.8 | 22.0 | 19.6 | 21.1 | 20.0 | 19.8 | 22.1 | 20.6 | 20.9 | 21.5 | 19.7 | 20.9 | 19.9 | 21.5 | 21.7 |      | 76.0 | 82.5 | 75.3 | 90.6 | 78.5 | 82.1 |  |
| 23  | <i>S. putrefaciens</i>    | 18.5 | 19.2 | 18.7 | 18.6 | 18.2 | 18.6 | 22.5 | 20.9 | 18.8 | 19.8 | 18.5 | 18.6 | 20.4 | 19.2 | 19.6 | 19.7 | 23.8 | 22.9 | 19.4 | 20.1 | 19.4 | 19.5 |      | 75.6 | 76.6 | 76.0 | 76.6 | 77.3 |  |
| 24  | <i>S. sediminis</i>       | 20.2 | 19.9 | 22.1 | 20.3 | 19.5 | 19.8 | 20.0 | 22.1 | 19.7 | 21.7 | 20.2 | 20.0 | 22.1 | 20.7 | 20.8 | 21.4 | 19.9 | 20.7 | 19.7 | 21.7 | 21.9 | 21.2 | 20.0 |      | 74.9 | 81.9 | 78.6 | 83.8 |  |
| 25  | <i>S. upenei</i>          | 83.7 | 18.2 | 19.9 | 51.8 | 56.5 | 18.1 | 18.9 | 20.2 | 18.7 | 19.9 | 84.1 | 55.4 | 19.1 | 20.1 | 18.7 | 19.3 | 18.8 | 19.1 | 18.3 | 19.7 | 19.1 | 19.5 | 18.6 | 19.8 |      | 75.3 | 75.2 | 74.8 |  |
| 26  | <i>S. violacea</i>        | 20.4 | 19.9 | 21.6 | 20.8 | 19.5 | 19.3 | 20.3 | 22.5 | 19.6 | 21.4 | 20.2 | 20.0 | 23.3 | 21.2 | 21.2 | 22.3 | 20.4 | 21.6 | 20.0 | 21.9 | 21.6 | 28.2 | 20.5 | 21.5 | 19.7 |      | 77.7 | 81.8 |  |
| 27  | <i>S. waksmanii</i>       | 18.5 | 19.6 | 18.4 | 18.5 | 18.5 | 19.2 | 19.0 | 19.3 | 20.4 | 20.1 | 18.5 | 18.7 | 21.0 | 19.0 | 18.8 | 19.4 | 19.2 | 18.9 | 21.3 | 20.5 | 19.9 | 19.5 | 18.8 | 19.9 | 18.6 | 19.7 |      | 79.0 |  |
| 28  | <i>S. woodyi</i>          | 20.3 | 20.0 | 21.6 | 20.4 | 19.7 | 19.8 | 20.1 | 22.4 | 20.3 | 22.2 | 20.2 | 20.4 | 22.8 | 20.6 | 20.9 | 21.8 | 19.9 | 21.5 | 20.5 | 22.9 | 21.9 | 20.6 | 20.1 | 21.4 | 19.6 | 20.8 | 19.8 |      |  |

67

68
